# Supplementary material
Source: PubMed Central journal article supplement (PMC2818776)
Supplement: NIHMS166305-supplement-01.pdf [file NIHMS166305-supplement-01.pdf]

## Figure S1

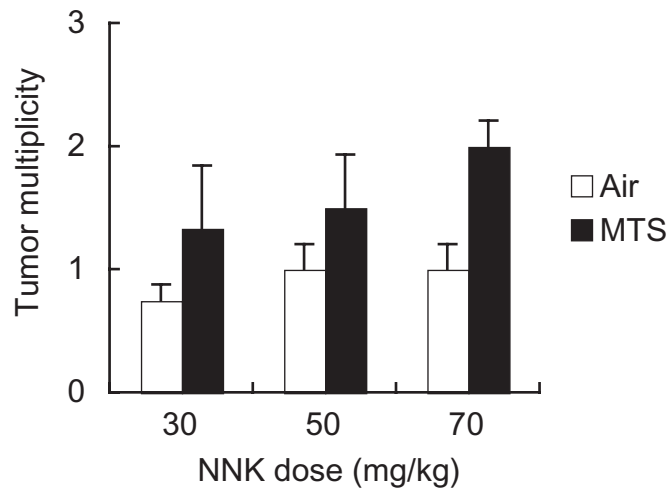

**Figure S1. Lung tumor multiplicity in male A/J mice given the indicated doses of NNK and 2 cig./day MTS exposure for 2 months followed by 1 cig./day for 3 months**

Tumor multiplicity was determined by serial sectioning at 350  $\mu$ m intervals after a final 4 months recovery period. Results are means  $\pm$  S.E. (n = 4 for each group).

**Figure S2**

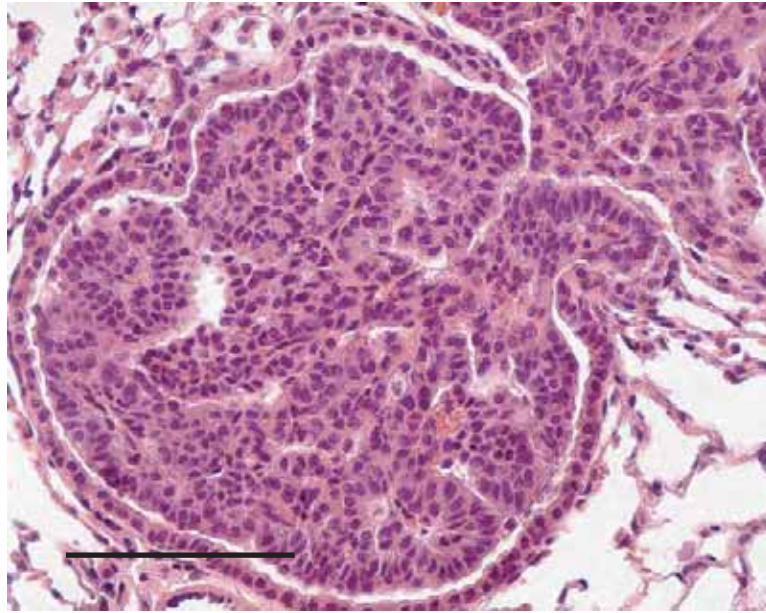

**Figure S2. Histological appearance of adenocarcinoma in NNK+MTS-treated mice**  
An adenocarcinoma with bronchial invasion found in NNK+MTS-treated A/J mouse.  
Scale bar = 100  $\mu$ m.

**Figure S3**

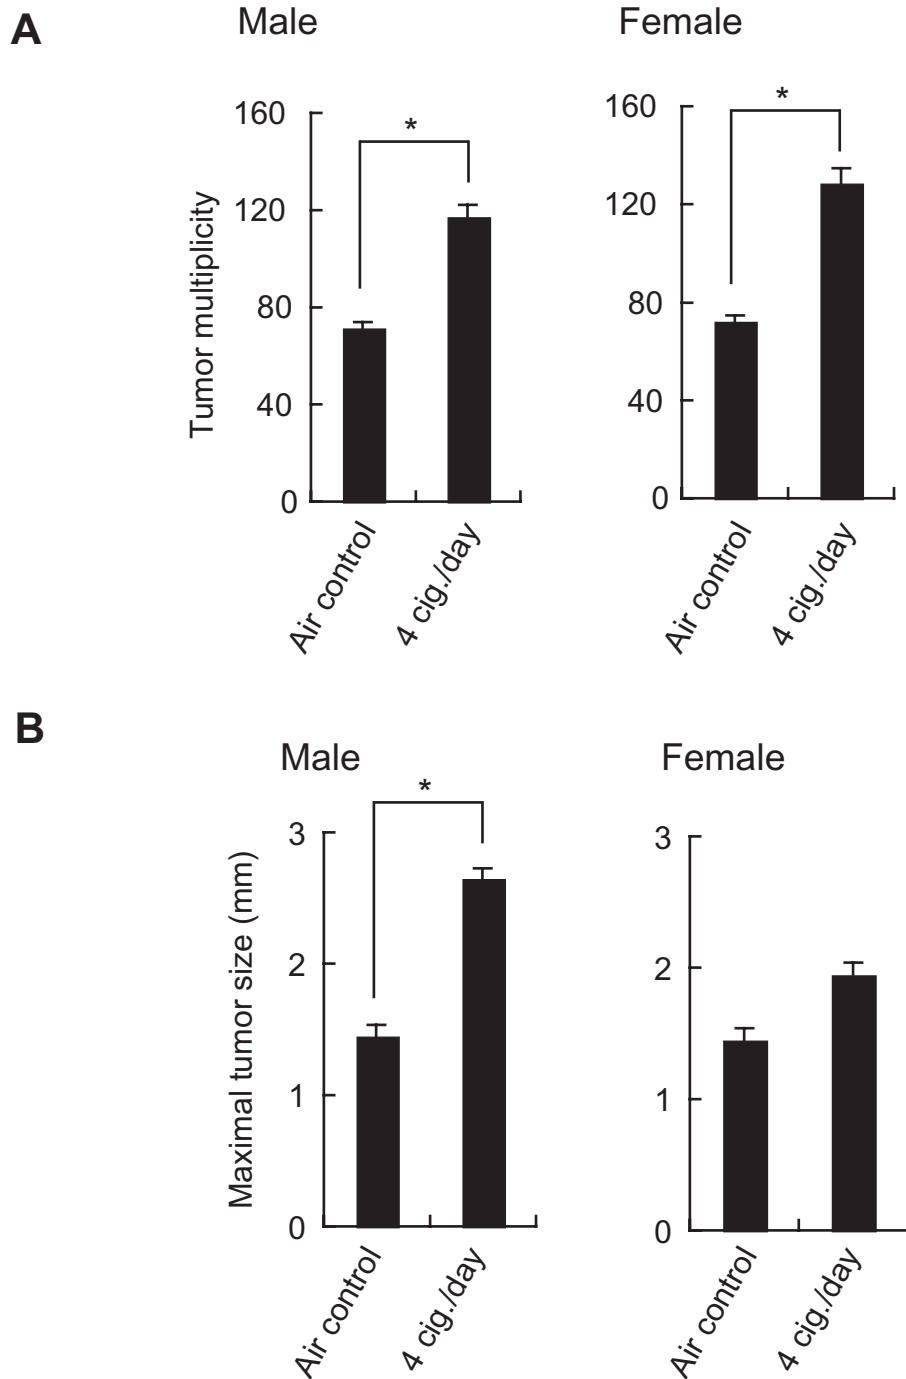

**Figure S3. MTS exposure promotes lung tumor development in male and female K-ras<sup>LA2</sup> mice**

Lung tumor multiplicity (A) and maximal tumor sizes (B) were determined by serial sectioning. Results are means  $\pm$  S.E. (male air control: n = 8; male 4 cig./day: n = 10; female air control: n = 8; female 4 cig./day: n = 8). Significant difference, \*P < 0.02.

## Figure S4

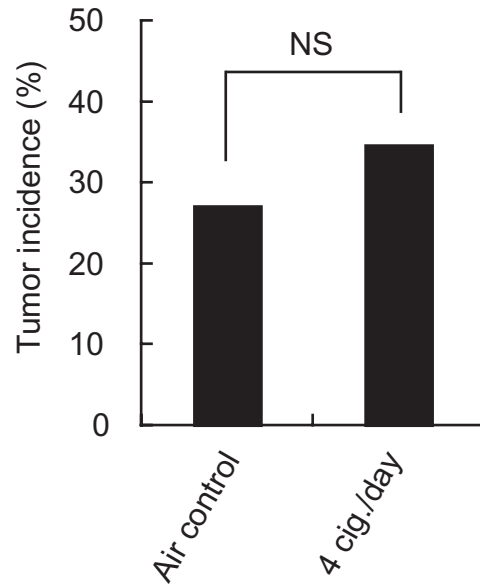

### Figure S4. Thymic lymphoma incidence in air- or MTS-exposed K-ras<sup>LA2</sup> mice

Sex-matched K-ras<sup>LA2</sup> mice were exposed to MTS as in Fig. 2A and analyzed at 5 months of age for thymic lymphoma (air control: n = 22; 4 cig./day: n = 23). NS, insignificant difference.

**Figure S5**

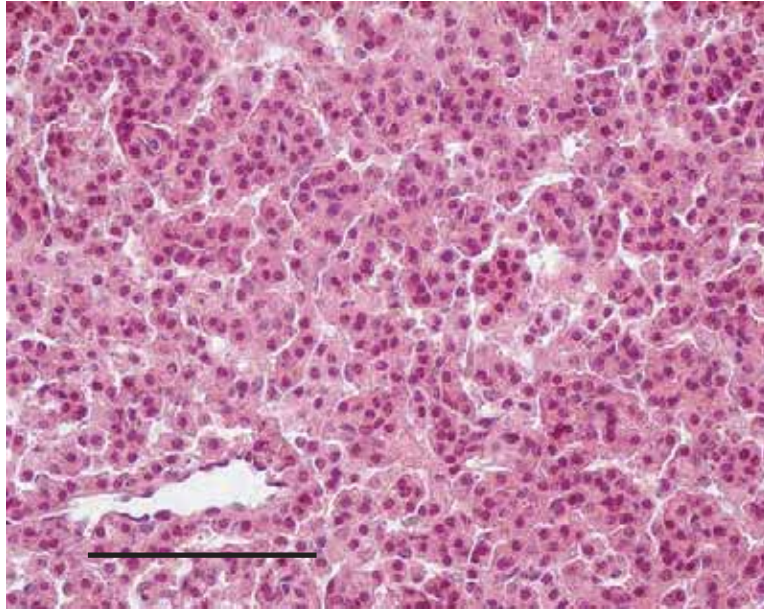

**Figure S5. Histological appearance of alveolar adenoma in MTS-exposed K-ras<sup>LA2</sup> mice**  
Alveolar adenoma found in MTS-exposed K-ras<sup>LA2</sup> mouse. Scale bar = 100  $\mu$ m.

## Figure S6

**A**

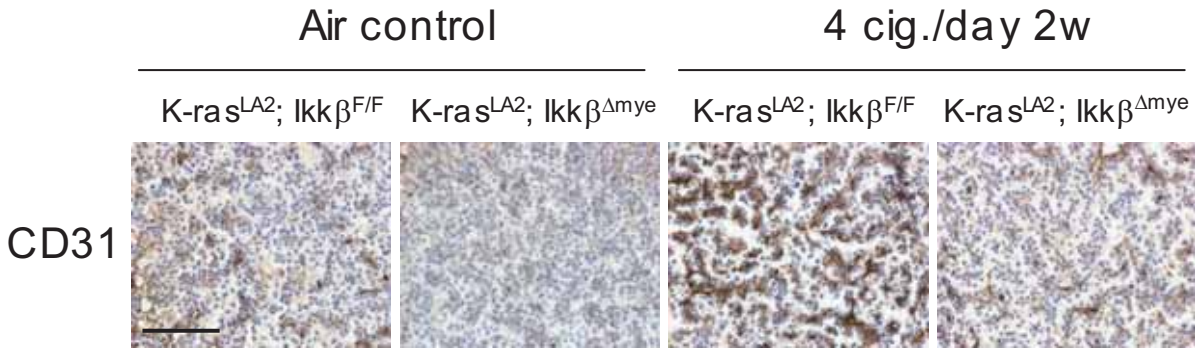

**B**

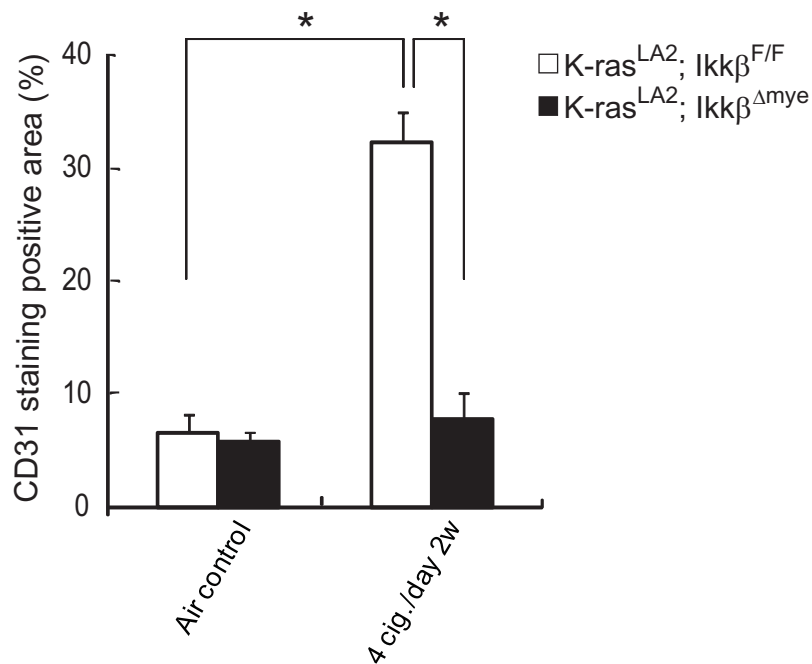

**Figure S6. Myeloid cell IKK $\beta$  deletion decreases MTS-enhanced tumor angiogenesis.**

Angiogenesis in lung adenomas in air- or MTS-exposed mice was determined by CD31 staining.

(A) Typical images of CD31-stained lung tumors in mice of the indicated genotypes.

Scale bar = 100  $\mu$ m.

(B) CD31-positive areas were quantitated by an image analyzer. Results are means  $\pm$  S.E.

*K-ras*<sup>LA2</sup>; *Ikk* $\beta$ <sup>F/F</sup> air control: *n* = 5; *K-ras*<sup>LA2</sup>; *Ikk* $\beta$ <sup>F/F</sup> 4 cig./day 2w: *n* = 5; *K-ras*<sup>LA2</sup>; *Ikk* $\beta$ <sup>Δmye</sup> air control: *n* = 6; *K-ras*<sup>LA2</sup>; *Ikk* $\beta$ <sup>Δmye</sup> 4 cig./day 2w: *n* = 6. Significant difference, \**P* < 0.01.

Figure S7

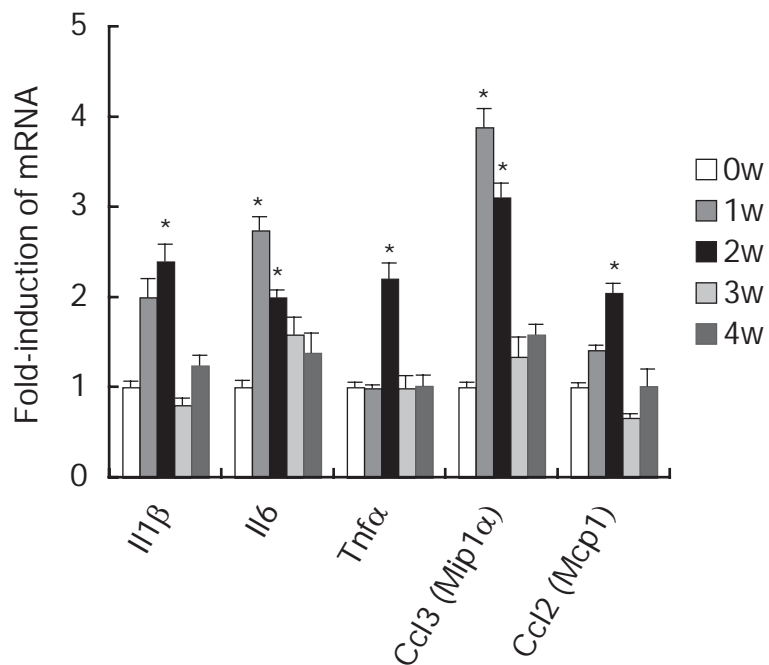

Figure S7. Induction of inflammatory cytokine and chemokine mRNAs in lungs of C57BL6 males exposed to 2 cig./day MTS

Lung RNA was isolated at indicated times after initiation of MTS exposure.

Results are means  $\pm$  S.E. (air control:  $n = 8$ ; 2 cig./day 1w:  $n = 9$ ; 2 cig./day 2w:  $n = 7$ ; 2 cig./day 3w:  $n = 4$ ; 2 cig./day 4w:  $n = 4$ ). Significant difference, \* $P < 0.04$ .

**Figure S**

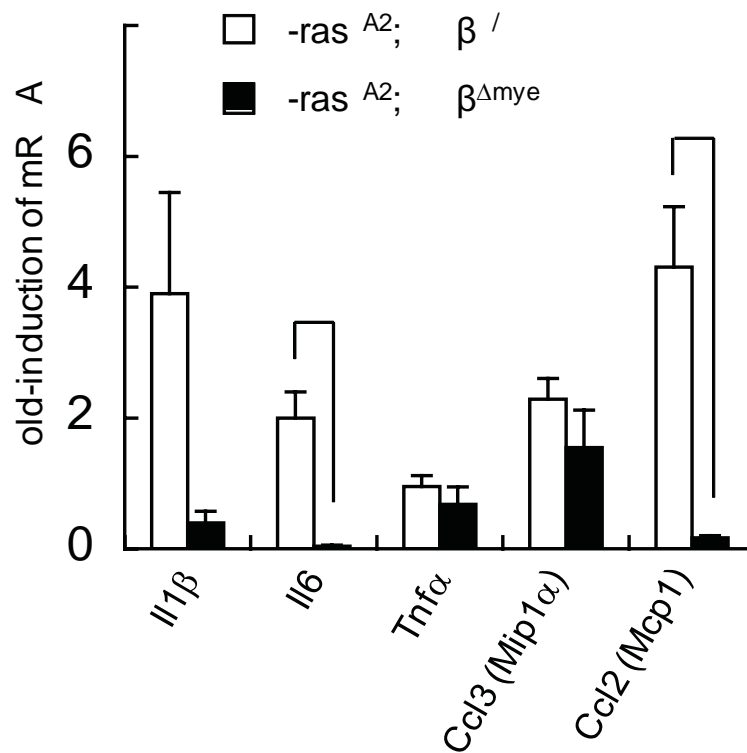

**Figure S . Myeloid cell IKK  $\beta$  deletion decreases MTS-induced inflammation in *K-ras* tumor-bearing mice**

Induction of inflammatory cytokine and chemokine mRNA in lungs of MTS-exposed *K-ras*<sup>A2</sup>; *Ikk $\beta$* <sup>+/+</sup> (n = 6) and *K-ras*<sup>A2</sup>; *Ikk $\beta$*  <sup>$\Delta mye$</sup>  (n = 5) mice was examined by RT-PCR 24 hrs after the last 2 week round of MTS exposure. Results are means  $\pm$  S.E. Significant difference,  $P < 0.00$ .



Figure S9

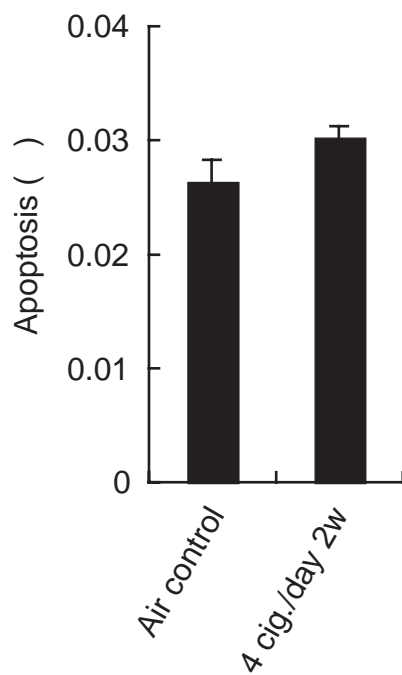

**Figure S9. Apoptosis in lungs of air- or MTS-exposed mice as determined by TUNST staining**

Induction of apoptosis above background could be detected 2 weeks after initiation of MTS exposure. Results are means  $\pm$  S.E. (air control:  $n = 5$ ; 4 cig./day:  $n = 5$ ).

Figure S10

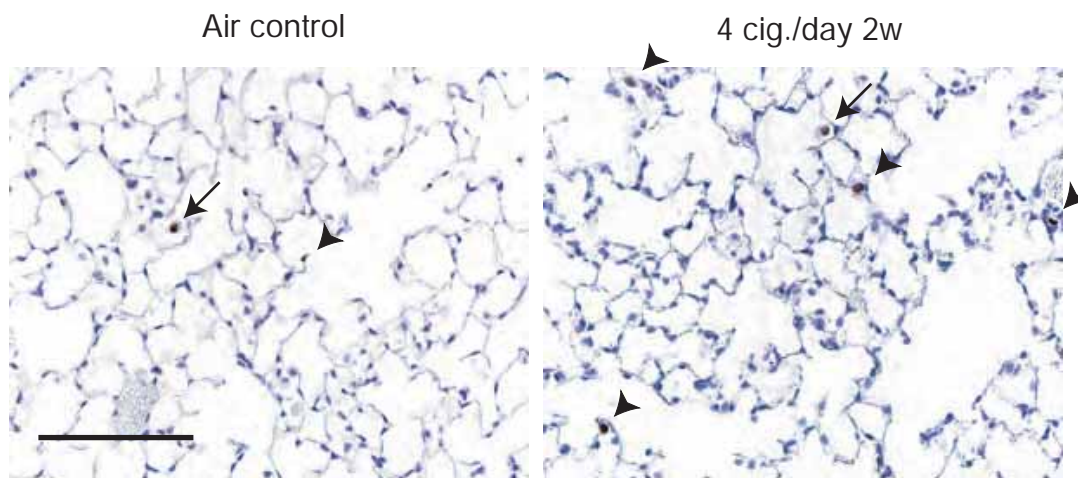

Figure S10. Proliferating cells in lung sections of air- or MTS-exposed mice were visualized by BrdU labeling  
BrdU was incorporated into immune cells (arrows) and alveolar epithelial cells (arrow heads). Scale bar = 100  $\mu$ m.

**Figure S**

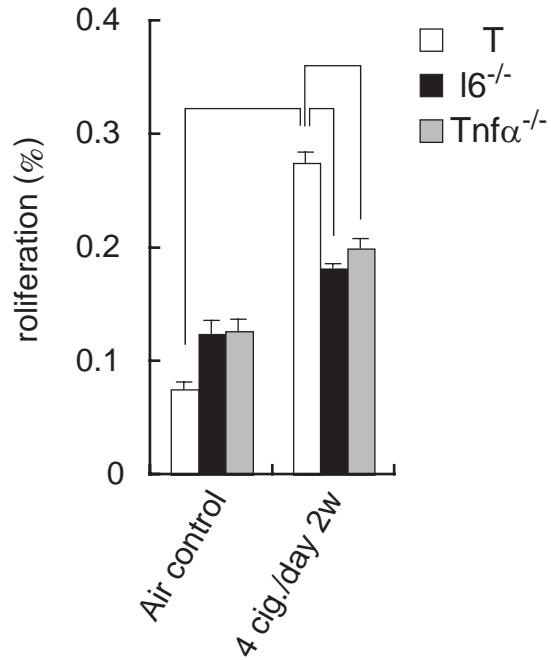

**Figure S .** Proliferation of IL-6 or TNF- $\alpha$  reduces MTS-induced pulmonary cell proliferation. Frequencies of proliferating cells in lungs of air- or MTS-exposed mice were determined by BrdU labeling as above. Results are means  $\pm$  S.E. ( T air control: n = ; T 4 cig./day: n = ; Il6<sup>-/-</sup> air control: n = 5; Il6<sup>-/-</sup> 4 cig./day: n = ; Tnf $\alpha$ <sup>-/-</sup> air control: n = 6; Tnf $\alpha$ <sup>-/-</sup> 4 cig./day: n = ). Significant difference, \*P < 0.05.

Figure S12

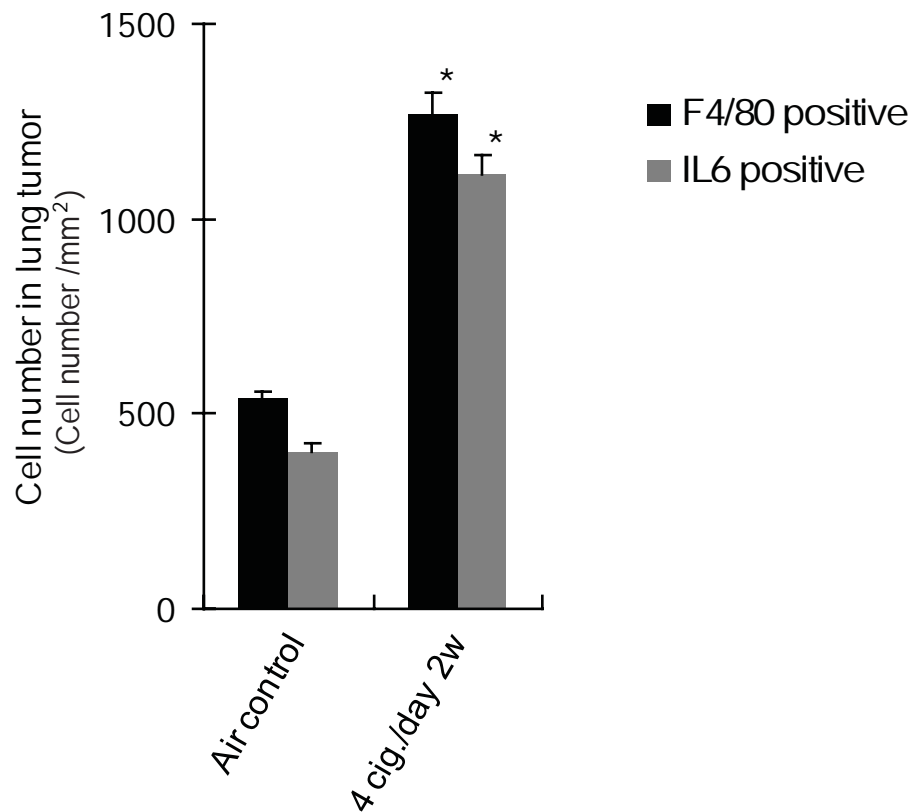

Figure S12. MTS exposure increases the number of IL-6-producing and F4/80- positive cells within tumors

Lung sections prepared at 24 hrs after last MTS exposure of K-ras<sup>LA2</sup> mice were immunostained for F4/80 and IL-6. The numbers of F4/80- or IL-6-positive cells in randomly selected lung adenomas were counted. Results are means  $\pm$  S.E. (n = 7 for each group) Significant difference, \* P < 0.002 vs. air control.

## Figure S

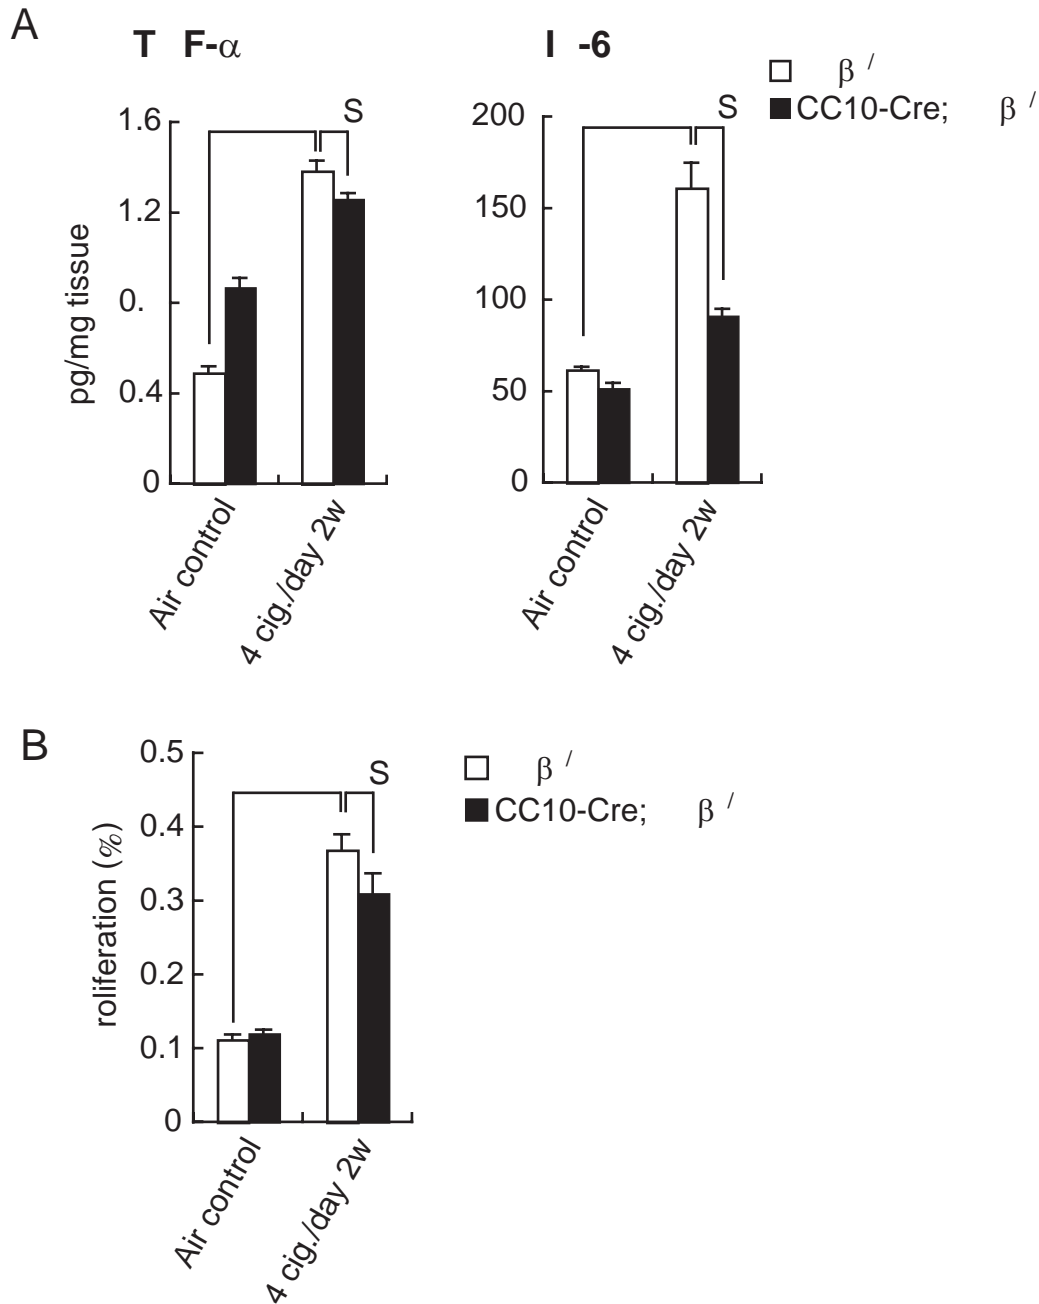

**Figure S . Exacerbation of IKK $\beta$  in airway epithelium results in a modest and statistically insignificant reduction in MTS-induced cytokine secretion and cell proliferation**

(A) Fresh lungs isolated from air- or MTS-exposed mice were cut into small pieces were incubated in culture medium at 37°C for 4 hrs and cytokines secreted into culture supernatants were measured by ELISA. Results are means  $\pm$  S.E. ( $\beta^{+/+}$  air control: n = 14;  $\beta^{+/+}$  4 cig./day: n = 10; CC10-Cre;  $\beta^{+/+}$  air control: n = 10; CC10-Cre;  $\beta^{+/+}$  4 cig./day: n = 10). Significant difference,  $p < 0.05$ .

S, insignificant difference.

(B) Proliferating cells in lungs of air- or MTS-exposed mice were visualized by BrdU labeling. Results showing frequencies of proliferating cells are means  $\pm$  S.E. (n = 10 per group).

Significant difference,  $p < 0.006$ . S, insignificant difference.

Figure S14

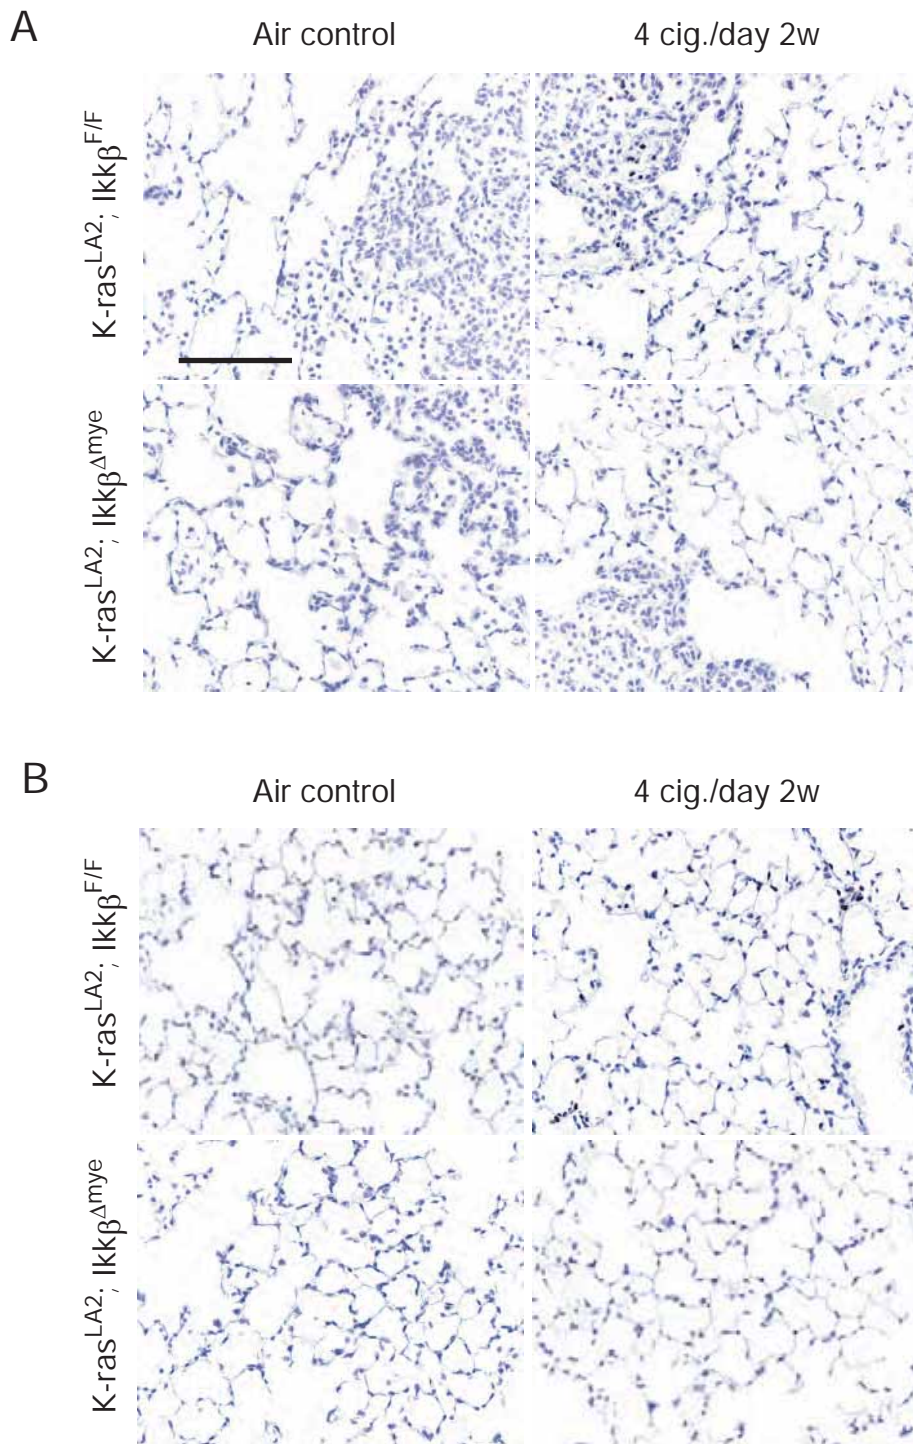

Figure S14. Myeloid cell IKK $\beta$  **deletion decreases MTS-induced ST T acti ation** lung sections prepared 24 hrs after last MTS exposure of the indicated mouse strains were analyzed by immunostaining for phospho-STAT3 (blac ). (A) Tumor margin. (B) normal lung. Scale bar = 100  $\mu$ m.

Figure S15

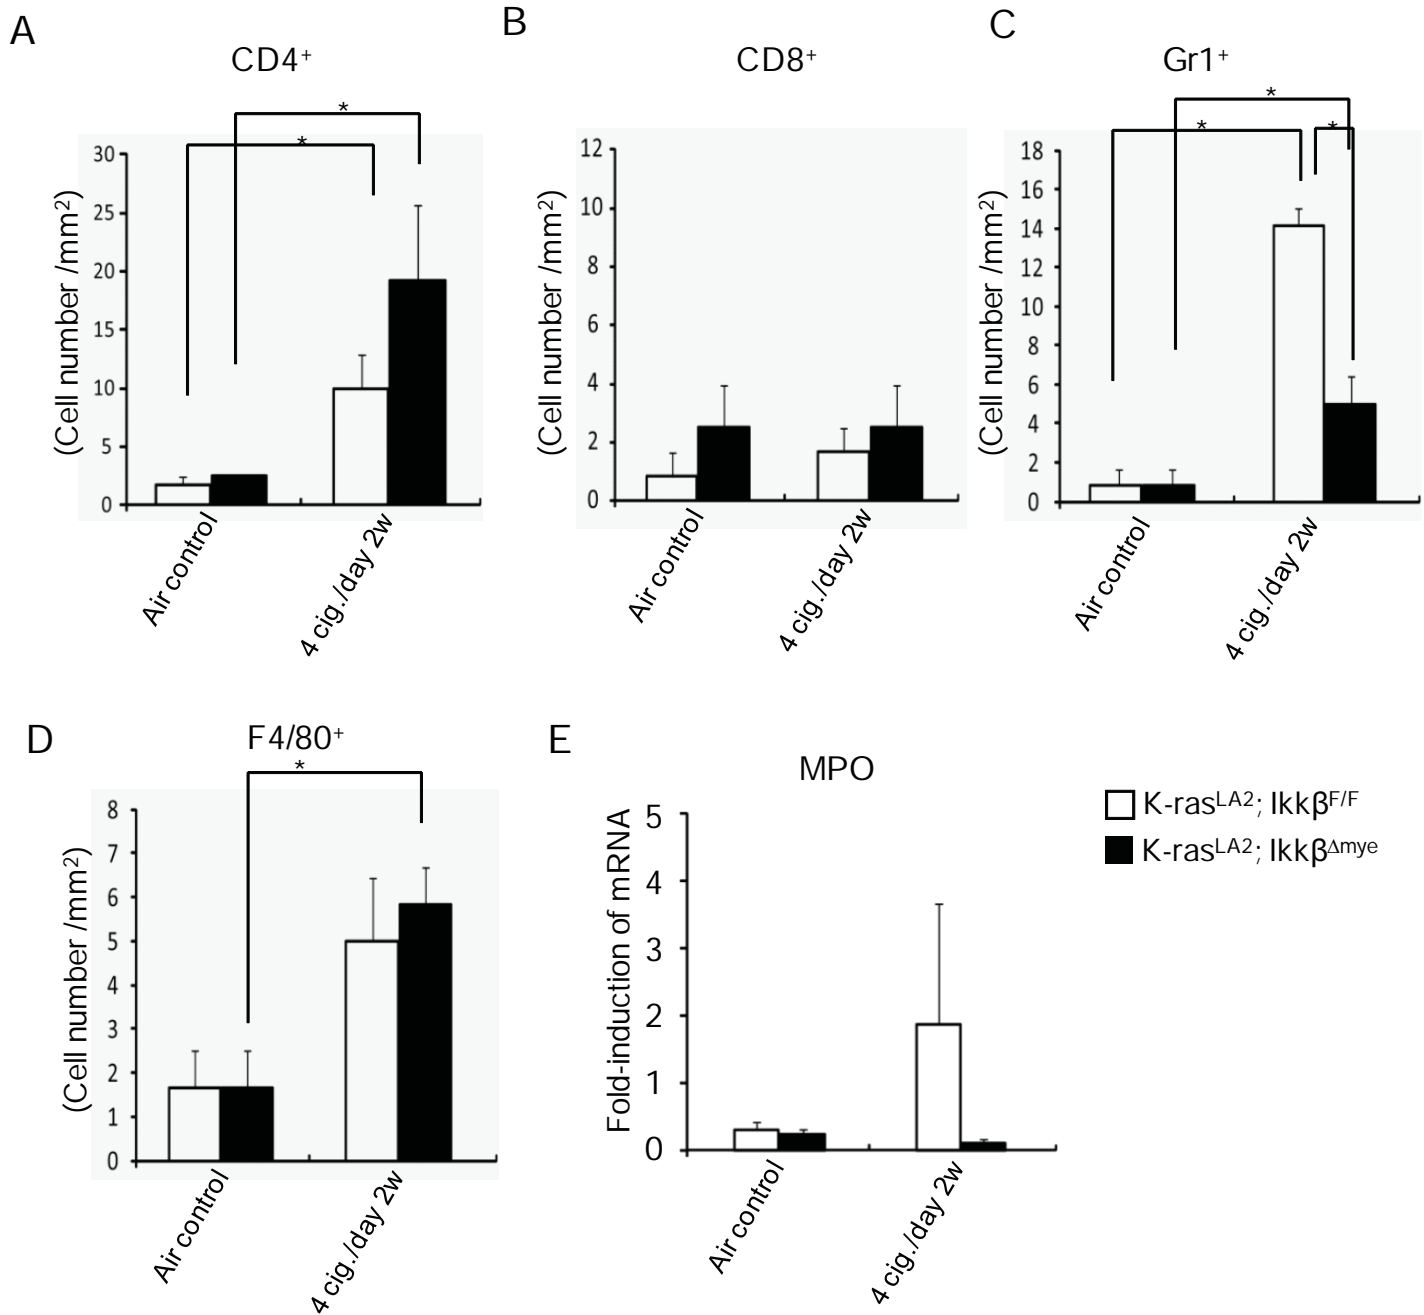

**Fig. S** . Presence of leukocytes in lungs of air- and MTS-exposed tumor-bearing mice

(A-D) Presence of CD4<sup>+</sup>(A), CD8<sup>+</sup>(B), Gr1<sup>+</sup>(C) and F4/80<sup>+</sup>(D) cells in lungs was determined by immunohistochemical analysis of frozen sections. Results are means ± S.E. K-ras<sup>LA2</sup>; Ikkβ<sup>F/F</sup> air control: n = 3; K-ras<sup>LA2</sup>; Ikkβ<sup>F/F</sup> 4 cig./day 2w: n = 3; K-ras<sup>LA2</sup>; Ikkβ<sup>Δmye</sup> air control: n = 3; and K-ras<sup>LA2</sup>; Ikkβ<sup>Δmye</sup> 4 cig./day 2w: n = 3. Significant difference, \*P < 0.05. (E) Expression of MPO mRNA in lungs was determined by QRT-PCR. Results are means ± S.E. K-ras<sup>LA2</sup>; Ikkβ<sup>F/F</sup> air control: n = 6; K-ras<sup>LA2</sup>; Ikkβ<sup>F/F</sup> 4 cig./day 2w: n = 6; K-ras<sup>LA2</sup>; Ikkβ<sup>Δmye</sup> air control: n = 4 and K-ras<sup>LA2</sup>; Ikkβ<sup>Δmye</sup> 4 cig./day 2w: n = 5.



Figure S16

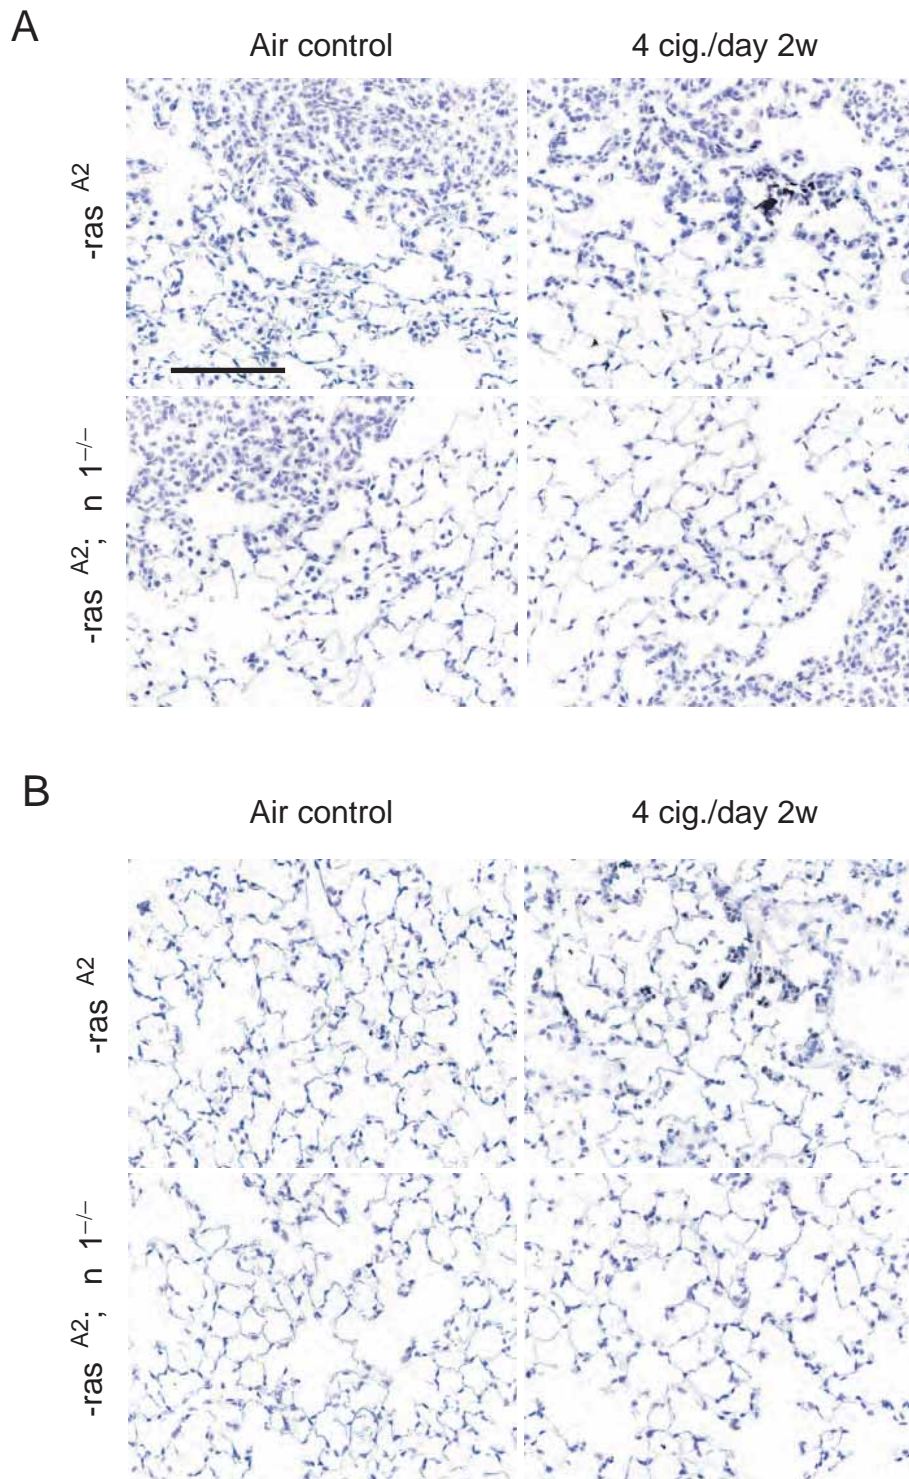

Figure S16. Deletion of JNK1 decreases MTS-induced STAT3 activation. Lung sections prepared 24 hrs after last MTS exposure of the indicated mouse strains were analyzed by immunostaining for presence of phospho-STAT3 (black). (a) Tumor margin. (b) Normal lung. Scale bar = 100  $\mu$ m.
